# Supplementary material for: Dissecting the effect of anions on Hg2+ detection using a FRET based DNA probe
Source: Royal Society of Chemistry journal article supplement (doi:10.1039/c2an35314h), 2012-01-01
Supplement: c2an35314h.pdf [file c2an35314h.pdf]

## Supporting Information

### **Dissecting the effect of anions on Hg<sup>2+</sup> detection using a FRET based DNA probe**

Mehmet Murat Kiy, Ahmed Zaki, Arsalsan Beg Menhaj, Azadeh Samadi and Juewen Liu\*

Department of Chemistry, Waterloo Institute for Nanotechnology, University of Waterloo

200 University Avenue West, Waterloo, Ontario, N2L 3G1, Canada

E-mail: liujw@uwaterloo.ca

**1.  $\text{Hg}^{2+}$  detection in the presence of various concentration of  $\text{I}^-$ .** The responses of our FRET-based sensor to  $\text{Hg}^{2+}$  in the presence of 0 to 2  $\mu\text{M}$   $\text{I}^-$  are shown in Figure S1A. With just 2  $\mu\text{M}$   $\text{I}^-$ , the sensor response was completely inhibited. The relative sensitivity of the sensor as a function of  $\text{I}^-$  concentration is shown in Figure S1B and an inhibition constant of 0.13  $\mu\text{M}$   $\text{I}^-$  was obtained.

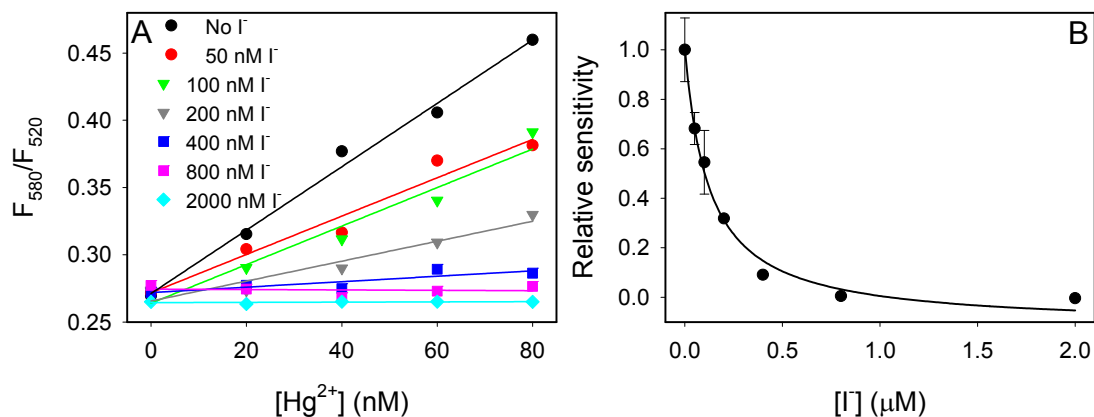

**Figure S1.** Sensor response in the presence of various concentrations of  $\text{I}^-$ .

**2. Fluorescence quenching by  $\text{Br}^-$  and  $\text{I}^-$ .** It is commonly known in fluorescence spectroscopy that heavy atoms such as  $\text{I}^-$  are fluorescence quenchers. To rule out possible artifacts associated with fluorescence quenching by these heavy atoms, we compared the FAM fluorescence intensity in the presence of  $\text{I}^-$  and  $\text{Br}^-$ . Figure S2A is from the raw data of Figure 2E, and no obvious quenching was observed up to 20 mM  $\text{Br}^-$ . These samples were prepared individually (not titrating  $\text{Br}^-$ ) and therefore, the sample-to-sample variation was relatively large because of the slightly changed fluorophore concentration in each sample. Although we only studied the effect of  $\text{I}^-$  up to 2  $\mu\text{M}$ , little quenching was observed with even 1 mM  $\text{I}^-$ , thus excluding the possibility of artifacts associated with fluorescence quenching by these heavy ions. This is not surprising since to achieve significant quenching, greater than 10 mM  $\text{I}^-$  is typically needed.

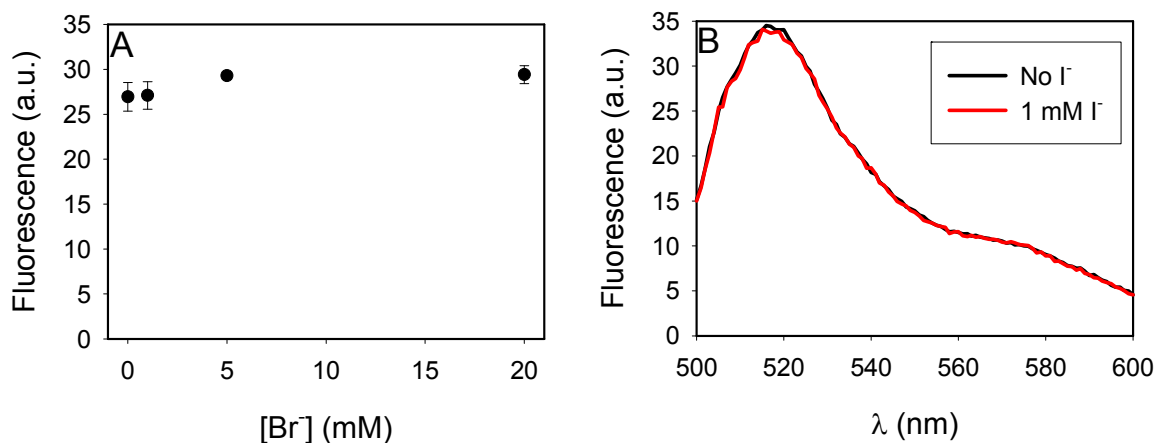

**Figure S2.** (A) FAM fluorescence intensity as a function of  $\text{Br}^-$  concentration taken from the raw data in Figure 2E of the paper. (B) Fluorescence spectra of the DNA probe in the absence or presence of 1 mM  $\text{I}^-$ .

**3.  $\text{Hg}^{2+}$  detection in Lake Ontario water.** To 490  $\mu\text{L}$  Lake Ontario water, 10  $\mu\text{L}$  of 500 mM HEPES was added to adjust pH to 7.6. For comparison another sample containing just 10 mM HEPES buffer was also prepared. After adding the sensor DNA,  $\text{Hg}^{2+}$  was titrated into both samples and the sensor responses were plotted in Figure S3. The Lake Ontario water has a much higher initial FRET ratio, consistent with the presence of  $>1$  mM divalent metal ions. The slope was similar to that in buffer, suggesting that most of the anions in the Lake were non-coordinating. This is consistent with that the  $\text{Cl}^-$  concentration in the Lake water was just below 1 mM.

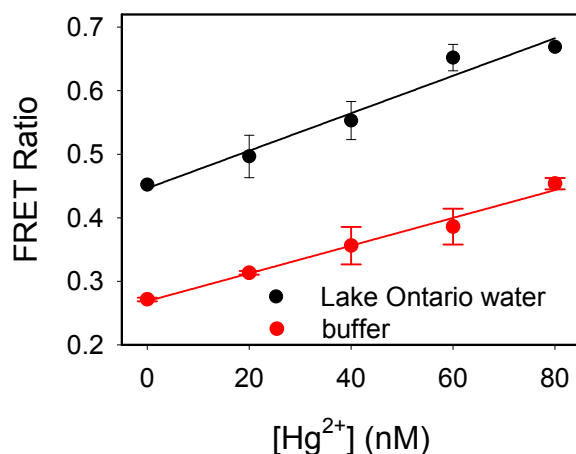

**Figure S3.** Sensor response in Lake Ontario water and in buffer containing 10 mM HEPES (pH 7.6).
